# Supplementary material
Source: MDPI journal article supplement (https://www.mdpi.com/2076-3417/9/21/4589)
Supplement: s1 [file s1]

## **Supplementary Material: Data of the study.**

Martina Caramenti, Claudio L. Lafortuna, Elena Mugellini, Omar Abou Khaled, Jean-Pierre Bresciani and Amandine Dubois

**Supplementary Table T1.** Data of Experiment 1. Selected running speed and duration of the task in the different optical flow (OF) conditions (0 = noOF, 1 = matchOF, 2 = slowOF, 3 = fastOF).

**Supplementary Table T2.** Data of Experiment 2. Preferred running speed (Running.speed) and visual speed perceived as matching the actual treadmill speed (Visual.speed). Spatio-temporal gait parameters, i.e. step length (st.Length), step duration (st.Duration), step frequency (st.Freq) and step width (st.Width) in the different optical flow conditions (0 = noOF, 1 = matchOF, 2 = fastOF, 3 = slowOF). Perceived effort (Borg.RPE), starting heart rate (startHR) and mean heart rate (HR) for each optical flow condition.
